# Supplementary material
Source: publisher figshare collection journal article supplement (https://rs.figshare.com/ndownloader/files/18513968)
Supplement: Supplementary file 1 [file 18513968]

**Title:** Flight capacity increases then declines from the core to the margins of an invasive species’ range.

**Author:** Andrew C. Merwin

**Figure S1:** Relationship between kudzu bug size (pronotal width) and density of nymphs within colonies. The solid line represents the predicted values of a linear model, while the dashed lines provide the 95% confidence intervals (p = 0.015, r2 = 0.03)

**
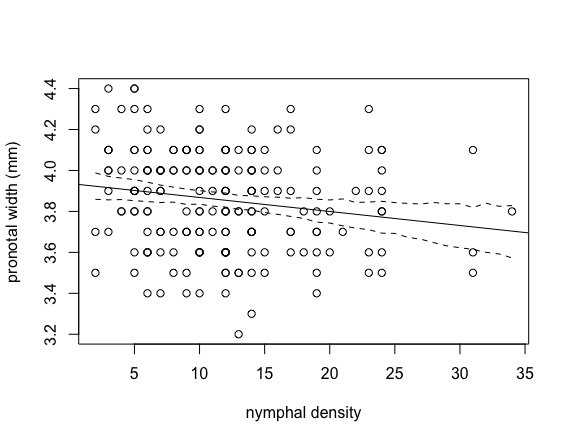
**

**Figure S2:** Relationship between kudzu bug average flight speed (m/s) and density of nymphs within colonies. The solid line represents the predicted values of a linear model, while the dashed lines provide the 95% confidence intervals (p < 0.001, r2 = 0.09).

**
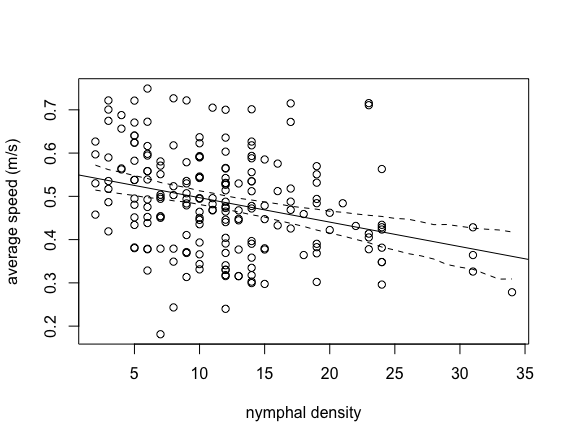
**
